# Supplementary material for: Radical Scavenging and Cellular Antioxidant Activity of the Cocoa Shell Phenolic Compounds after Simulated Digestion
Source: MDPI journal article supplement (doi:10.3390/antiox12051007), 2023-04-26
Supplement: s1 [file s1]

# **Radical Scavenging and Cellular Antioxidant Activity of the Cocoa Shell Phenolic Compounds after Simulated Digestion**

Silvia Cañas<sup>1,2</sup>, Miguel Rebollo-Hernanz<sup>1,2</sup>, Patricia Bermúdez-Gómez<sup>1,2</sup>, Pilar Rodríguez-Rodríguez,<sup>3</sup> Cheyenne Braojos<sup>1,2</sup>, Alicia Gil-Ramirez<sup>1,2</sup>, Vanesa Benítez<sup>1,2</sup>, Yolanda Aguilera<sup>1,2</sup>, María A. Martín-Cabrejas<sup>1,2\*</sup>

<sup>1</sup> Department of Agricultural Chemistry and Food Science, Faculty of Science, C/ Francisco Tomás y Valiente, 7. Universidad Autónoma de Madrid, 28049, Madrid, Spain.

<sup>2</sup> Institute of Food Science Research (CIAL, UAM-CSIC). C/ Nicolás Cabrera, 9. Universidad Autónoma de Madrid, 28049, Madrid, Spain.

<sup>3</sup> Department of Physiology, Faculty of Medicine, Universidad Autónoma de Madrid, C/Arzobispo Morcillo 2, 28029 Madrid, Spain

\* Correspondence: [maria.martin@uam.es](mailto:maria.martin@uam.es)

**Supplementary Table S1.** Correlation coefficients between phenolic compounds and methylxanthines, and the radical scavenging, cellular antioxidant activity, and cytoprotective properties of the cocoa shell flour (CSF) and extract (CSE).

| Compounds                                    | TPC     | ABTS     | FRAP   | O <sub>2</sub> <sup>•−</sup> | H <sub>2</sub> O <sub>2</sub> | NO     | ONOO <sup>−</sup> | V-IEC-6 | V-HepG2 | ROS IEC-6 | ROS HepG2 |
|----------------------------------------------|---------|----------|--------|------------------------------|-------------------------------|--------|-------------------|---------|---------|-----------|-----------|
| <b>Cocoa shell flour</b>                     |         |          |        |                              |                               |        |                   |         |         |           |           |
| <i>Hydroxybenzoic acids</i>                  |         |          |        |                              |                               |        |                   |         |         |           |           |
| Gallic acid                                  | 0.811   | 0.963*   | 0.725  | 0.262                        | 0.832                         | −0.414 | 0.985**           | 0.689   | 0.682   | 0.965*    | 0.384     |
| Protocatechuic acid                          | 0.433   | 0.738    | 0.559  | −0.202                       | 0.478                         | −0.645 | 0.925*            | 0.405   | 0.631   | 0.700     | 0.074     |
| <i>Total</i>                                 | 0.674   | 0.899    | 0.681  | 0.064                        | 0.706                         | −0.535 | 0.994**           | 0.591   | 0.687   | 0.883     | 0.264     |
| <i>N-phenylpropenoyl-L-amino acids</i>       |         |          |        |                              |                               |        |                   |         |         |           |           |
| <i>N</i> -Coumaroyl-L-aspartate <i>cis</i>   | 0.581   | 0.238    | 0.373  | 0.580                        | 0.543                         | 0.249  | −0.173            | 0.573   | 0.194   | 0.198     | 0.757     |
| <i>N</i> -Coumaroyl-L-aspartate <i>trans</i> | 0.358   | 0.008    | 0.292  | 0.316                        | 0.327                         | 0.152  | −0.414            | 0.462   | 0.161   | −0.094    | 0.730     |
| <i>N</i> -Coumaroyl-L-tyrosine               | 0.979*  | 0.984**  | 0.884  | 0.372                        | 0.988**                       | −0.388 | 0.818             | 0.915*  | 0.788   | 0.930*    | 0.725     |
| <i>N</i> -Caffeoyl-L-DOPA <i>cis</i>         | −0.393  | −0.056   | −0.359 | −0.271                       | −0.366                        | −0.075 | 0.371             | −0.517  | −0.236  | 0.065     | −0.776    |
| <i>Total</i>                                 | 0.687   | 0.391    | 0.592  | 0.418                        | 0.664                         | −0.018 | −0.033            | 0.749   | 0.442   | 0.285     | 0.903*    |
| <i>Flavan-3-ols</i>                          |         |          |        |                              |                               |        |                   |         |         |           |           |
| (+)-Catechin                                 | 0.341   | 0.663    | 0.554  | −0.359                       | 0.393                         | −0.742 | 0.856             | 0.373   | 0.657   | 0.589     | 0.066     |
| (−)-Epicatechin                              | −0.195  | −0.485   | −0.064 | −0.132                       | −0.214                        | 0.105  | −0.799            | 0.030   | −0.093  | −0.624    | 0.387     |
| <i>Total</i>                                 | 0.342   | 0.651    | 0.616  | −0.447                       | 0.398                         | −0.830 | 0.809             | 0.428   | 0.731   | 0.537     | 0.151     |
| <i>Flavonols</i>                             |         |          |        |                              |                               |        |                   |         |         |           |           |
| Quercetin 3- <i>O</i> -glucoside             | −0.979* | −0.984** | −0.884 | −0.372                       | −0.988**                      | 0.388  | −0.818            | −0.915* | −0.788  | −0.930*   | −0.725    |
| Quercetin 3- <i>O</i> -arabinoside           | −0.979* | −0.984** | −0.884 | −0.372                       | −0.988**                      | 0.388  | −0.818            | −0.915* | −0.788  | −0.930*   | −0.725    |
| <i>Total</i>                                 | −0.979* | −0.984** | −0.884 | −0.372                       | −0.988**                      | 0.388  | −0.818            | −0.915* | −0.788  | −0.930*   | −0.725    |
| <i>Methylxanthines</i>                       |         |          |        |                              |                               |        |                   |         |         |           |           |
| Theobromine                                  | 0.765   | 0.892    | 0.955* | −0.152                       | 0.804                         | −0.801 | 0.798             | 0.868   | 0.971*  | 0.727     | 0.679     |
| Caffeine                                     | 0.777   | 0.871    | 0.979* | −0.155                       | 0.815                         | −0.804 | 0.735             | 0.905*  | 0.989** | 0.688     | 0.745     |
| <i>Total</i>                                 | 0.769   | 0.888    | 0.961* | −0.153                       | 0.808                         | −0.803 | 0.785             | 0.770   | 0.976*  | 0.719     | 0.696     |
| <b>Cocoa shell extract</b>                   |         |          |        |                              |                               |        |                   |         |         |           |           |

|                                        |          |           |        |        |         |         |        |         |        |        |         |
|----------------------------------------|----------|-----------|--------|--------|---------|---------|--------|---------|--------|--------|---------|
| <hr/>                                  |          |           |        |        |         |         |        |         |        |        |         |
| <i>Hydroxybenzoic acids</i>            |          |           |        |        |         |         |        |         |        |        |         |
| Gallic acid                            | 0.013    | 0.138     | −0.270 | 0.369  | 0.606   | −0.514  | 0.548  | −0.302  | −0.408 | −0.259 | −0.915* |
| Protocatechuic acid                    | −0.393   | −0.194    | 0.405  | 0.969* | −0.250  | 0.210   | −0.323 | −0.014  | −0.591 | −0.405 | −0.244  |
| Total                                  | −0.087   | 0.067     | −0.125 | 0.549  | 0.444   | −0.377  | 0.377  | −0.256  | −0.488 | −0.317 | −0.825  |
| <i>N-phenylpropenoyl-L-amino acids</i> |          |           |        |        |         |         |        |         |        |        |         |
| N-Coumaroyl-L-aspartate <i>cis</i>     | −0.963*  | −0.997**  | 0.899  | 0.277  | −0.643  | 0.855   | −0.105 | −0.732  | 0.690  | 0.799  | 0.130   |
| N-Coumaroyl-L-aspartate <i>trans</i>   | −0.317   | −0.331    | −0.060 | −0.084 | 0.535   | −0.250  | 0.869  | −0.850  | 0.380  | 0.500  | −0.889  |
| N-Coumaroyl-L-tyrosine                 | −0.810   | −0.851    | 0.923* | 0.257  | −0.899  | 0.982** | −0.501 | −0.343  | 0.567  | 0.609  | 0.576   |
| N-Caffeoyl-L-aspartate                 | −0.997** | −0.991**  | 0.925* | 0.445  | −0.635  | 0.838   | −0.128 | −0.726  | 0.552  | 0.696  | 0.042   |
| N-Caffeoyl-L-DOPA <i>cis</i>           | −0.783   | −0.863    | 0.849  | 0.071  | −0.795  | 0.921*  | −0.339 | −0.448  | 0.727  | 0.750  | 0.517   |
| N-Caffeoyl-L-DOPA <i>trans</i>         | −0.989** | −0.998**  | 0.919* | 0.385  | −0.641  | 0.848   | −0.120 | −0.731  | 0.605  | 0.737  | 0.075   |
| Total                                  | −0.988** | −0.998**  | 0.895  | 0.367  | −0.592  | 0.813   | −0.060 | −0.772  | 0.620  | 0.756  | 0.016   |
| <i>Flavan-3-ols</i>                    |          |           |        |        |         |         |        |         |        |        |         |
| (+)-Catechin                           | 0.364    | 0.245     | −0.650 | −0.765 | 0.839   | −0.668  | 0.940* | −0.390  | 0.393  | 0.333  | −0.623  |
| (−)-Epicatechin                        | 0.512    | 0.431     | −0.786 | −0.678 | 0.947*  | −0.826  | 0.922* | −0.239  | 0.154  | 0.100  | −0.698  |
| Total                                  | 0.406    | 0.295     | −0.690 | −0.749 | 0.872   | −0.713  | 0.940* | −0.351  | 0.333  | 0.274  | −0.645  |
| <i>Flavonols</i>                       |          |           |        |        |         |         |        |         |        |        |         |
| Quercetin 3- <i>O</i> -glucoside       | −0.987** | −0.998*** | 0.918* | 0.376  | −0.641  | 0.849   | −0.119 | −0.732  | 0.613  | 0.743  | 0.080   |
| Quercetin 3- <i>O</i> -arabinoside     | −0.977*  | −0.999*** | 0.910* | 0.327  | −0.643  | 0.853   | −0.112 | −0.733  | 0.652  | 0.772  | 0.105   |
| Total                                  | −0.977*  | −0.999*** | 0.910* | 0.327  | −0.643  | 0.853   | −0.112 | −0.733  | 0.652  | 0.772  | 0.105   |
| <i>Flavones</i>                        |          |           |        |        |         |         |        |         |        |        |         |
| Apigenin-6,8-di- <i>C</i> -glucoside   | −0.786   | −0.812    | 0.932* | 0.323  | −0.941* | 0.993** | −0.589 | −0.257  | 0.478  | 0.520  | 0.626   |
| <i>Methylxanthines</i>                 |          |           |        |        |         |         |        |         |        |        |         |
| Theobromine                            | −0.667   | −0.616    | 0.363  | 0.369  | 0.133   | 0.133   | 0.520  | −0.872  | 0.279  | 0.471  | −0.735  |
| Caffeine                               | −0.785   | −0.759    | 0.503  | 0.331  | −0.018  | 0.302   | 0.450  | −0.933* | 0.439  | 0.621  | −0.600  |
| Total                                  | −0.668   | −0.617    | 0.364  | 0.368  | 0.132   | 0.134   | 0.520  | −0.873  | 0.280  | 0.472  | −0.734  |

TPC: Total Phenolic Content; ABTS: ABTS antioxidant capacity; FRAP: FRAP antioxidant capacity; O<sup>2•−</sup>: O<sup>2•−</sup> scavenging; H<sub>2</sub>O<sub>2</sub>: H<sub>2</sub>O<sub>2</sub> scavenging; NO: NO scavenging; ONOO<sup>−</sup>: ONOO<sup>−</sup> scavenging; V-IEC-6: viability-IEC-6; V-HepG2: viability-HepG2; ROS IEC-6: reactive oxygen species IEC-6; ROS HepG2: reactive oxygen species HepG2.
